# Supplementary material for: Berry Extracts and Their Bioactive Compounds Mitigate LPS and DNFB-Mediated Dendritic Cell Activation and Induction of Antigen Specific T-Cell Effector Responses
Source: MDPI journal article supplement (doi:10.3390/antiox12091667), 2023-08-24
Supplement: s1 [file s1]

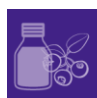

## Article

# Berry Extracts and Their Bioactive Compounds Mitigate LPS and DNFB-Mediated Dendritic Cell Activation and Induction of Antigen Specific T-Cell Effector Responses

Puja Upadhaya <sup>1</sup>, Felipe F Lamenza <sup>1,2</sup>, Suvekshya Shrestha <sup>1,2</sup>, Peyton Roth <sup>1</sup>, Sushmitha Jagadeesha <sup>1</sup>, Hasan Pracha <sup>1</sup>, Natalie A Horn <sup>1</sup> and Steve Oghumu <sup>1\*</sup>

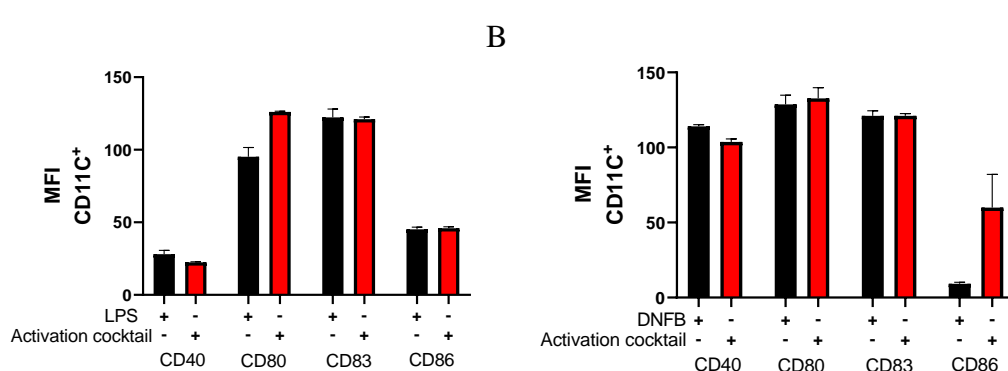

**Figure S1.** (A–B) Effect of DNFB and LPS activation markers CD40, CD80, CD83 and CD86 on Flt3L generated BMDCs as compared to activation cocktail.

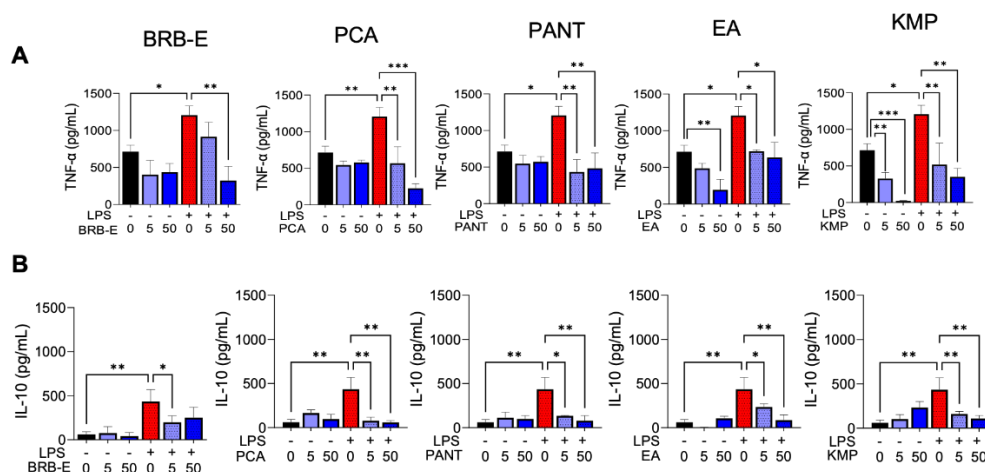

**Figure S2.** Effects of BRB-E, protocatechuic acid, proanthocyanidins, ellagic acid and kaempferol on the production of TNF-α and IL-10 by LPS-stimulated DCs. Supernatants were collected from DCs after 24 h of LPS (100 ng/mL) stimulation. (A) TNF-α (pg/mL) production by cells after treatment with BRB-E, PCA, PANT, EA, and KMP as determined by ELISA. (B) IL-10 (pg/mL) production after treatment with BRB-E, PCA, PANT, EA, and KMP as determined by ELISA (N = 4 per group). Data are represented as mean ± SEM. \*p-value <0.05; \*\*p-value <0.01; \*\*\*p-value <0.001 for comparisons between the LPS to no LPS, and LPS to natural compound treatment groups using one-way ANOVA.

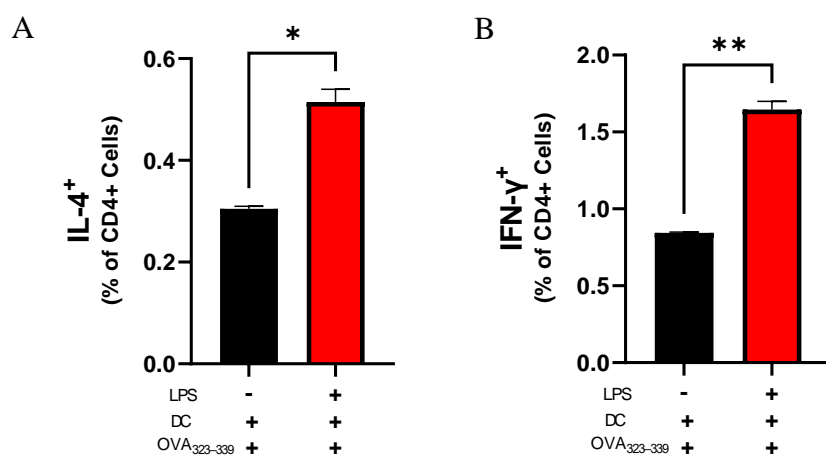

**Figure S3.** Phenotype of CD4<sup>+</sup> T Cells of OT-II mice. (A) Frequency of IL-4 and (B) IFN-γ expression by CD4<sup>+</sup> cells in no LPS and LPS group, determined by flow cytometry. Data are represented as mean ± SEM. \*p-value <0.05; \*\*p-value <0.01 for comparisons between the LPS and no LPS, and LPS groups using one-way ANOVA.
